# Supplementary material for: Noncontact Optical Measurement of Aqueous Humor Glucose Levels and Correlation with Serum Glucose Levels in Rabbit
Source: MDPI journal article supplement (doi:10.3390/bios11100387), 2021-10-13
Supplement: s1 [file s1]

**Table S1.** Aqueous glucose levels and serum glucose levels before (20 mins) and after (60 mins) the intra-venous glucose challenge. Each rabbit had two observations.

| Rabbit no. | Time (min) | Aqueous glucose (mg/dL) | Blood glucose (mg/dL) |
|------------|------------|-------------------------|-----------------------|
| 1          | 20         | 169                     | 191                   |
|            | 60         | 236                     | 275                   |
| 2          | 20         | 133                     | 152                   |
|            | 60         | 171                     | 204                   |
| 3          | 20         | 127                     | 152                   |
|            | 60         | 216                     | 195                   |
| 4          | 20         | 191                     | 194                   |
|            | 60         | 253                     | 217                   |
